# Supplementary material
Source: publisher figshare collection journal article supplement (https://tandf.figshare.com/ndownloader/files/20125586)
Supplement: Supplementary file 1 [file 20125586]

**Table S1.** Variance Inflation Factors (VIF) obtained from the linear mixed-effects models.

|  | Sex | Suburban land use | Urban land use |
| --- | --- | --- | --- |
| *Fore wings* |  |  |  |
| PC1 | 1.01 | 1.11 | 1.12 |
| PC2 | 1.01 | 1.11 | 1.12 |
| PC3 | 1.01 | 1.11 | 1.12 |
| Wing aspect ratio | 1.01 | 1.11 | 1.12 |
| Wing loading | 1.00 | 1.12 | 1.12 |
| Wing size | 1.00 | 1.12 | 1.12 |
| *Hind wings* |  |  |  |
| PC1 | 1.02 | 1.09 | 1.11 |
| PC2 | 1.01 | 1.10 | 1.11 |
| PC3 | 1.01 | 1.10 | 1.11 |
| Wing aspect ratio | 1.02 | 1.09 | 1.11 |
| Wing loading | 1.01 | 1.12 | 1.12 |
| Wing size | 1.01 | 1.11 | 1.12 |
